# Supplementary material
Source: MDPI journal article supplement (https://www.mdpi.com/2073-445X/10/3/236)
Supplement: s1 [file s1]

Article

# Supplementary Material: Morpho-Physio-Biochemical Attributes of Roadside Trees as Potential Tools for Biomonitoring of Air Quality and Environmental Health in Urban Areas

Ha Na You, Myeong Ja Kwak, Sun Mi Je, Jong Kyu Lee, Yea Ji Lim, Handong Kim, Sanghee Park, Su Gyeong Jeong, Yun Soo Choi and Su Young Woo

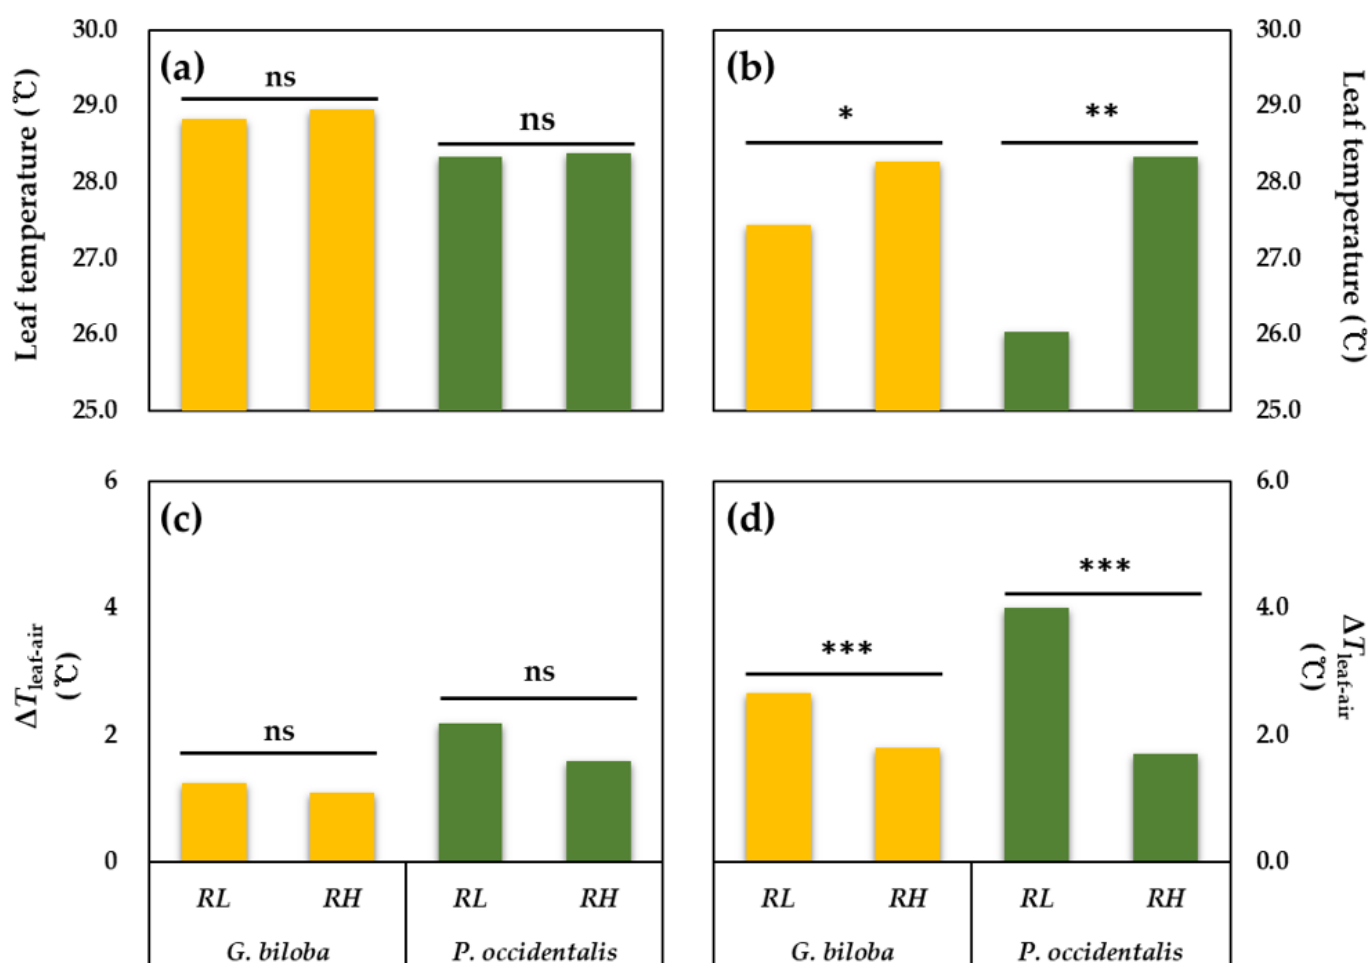

**Supplementary Figure S1.** Leaf temperature and leaf-to-air temperature differences ( $\Delta T_{\text{leaf-air}}$ ) in *Ginkgo biloba* and *Platanus occidentalis* growing in roadsides with low air pollution (RL) and roadsides with high air pollution (RH). (a) and (b) leaf temperature in June and August; (c) and (d)  $\Delta T_{\text{leaf-air}}$  in June and August. Bars in each graphic represent the means of five replicates. Yellow and green bars denote *Ginkgo biloba* and *Platanus occidentalis*, respectively. Asterisks indicate statistically significant differences according to independent samples t-tests between RL and RH within each tree species (\* $p < 0.05$ ; \*\* $p < 0.01$ ; \*\*\* $p < 0.001$ ; ns: not significant).
